# Supplementary material for: Effectiveness of Tuina Therapy Combined With Yijinjing Exercise in the Treatment of Nonspecific Chronic Neck Pain: A Randomized Clinical Trial
Source: PubMed Central journal article supplement (PMC9856335; doi:10.1001/jamanetworkopen.2022.46538), 2022-12-13
Supplement: jamanetwopen-e2246538-s001.pdf [file jamanetwopen-e2246538-s001.pdf]

1 Study Protocol.....2

2

3

4

5

6

7

8

9

10

11

12

13

14

15

16

17

18

19

20

21

22

23

24  
25  
26  
27  
28  
29  
30  
31  
32  
33  
34  
35  
36  
37  
38  
39  
40  
41  
42  
43  
44  
45  
46  
47  
48  
49  
50  
51  
52  
53  
54  
55  
56  
57  
58  
59  
60  
61

## **Study Protocol**

Efficacy of Tuina combined with Yijinjing for patients with nonspecific chronic neck  
pain: a randomized controlled trial

Shanghai Municipal Hospital of Traditional Chinese Medicine  
School of Acupuncture-Moxibustion and Tuina, Shanghai University of Traditional  
Chinese Medicine  
Yueyang Hospital of Integrated Traditional Chinese and Western Medicine Affiliated  
to Shanghai University of Traditional Chinese Medicine

62 **1. Background**

63 Non-specific chronic neck pain (NCNP) is a serious health and public problem  
64 worldwide. Neck pain appears between the occipital condyle and C7 in the neck  
65 region [1]. Neck pain can be divided into specific neck pain and non-specific neck  
66 pain. Non-specific neck pain is also known as mechanical neck pain which is defined  
67 as simple neck pain without specific pathological changes and neurological  
68 impairments; it can be diagnosed as non-specific chronic neck pain if the symptoms  
69 persist more than 3 months [2]. Two-thirds of the adult population suffer from  
70 non-specific chronic neck pain [3]. According to the research, women are more likely  
71 to be affected than men [4]. The annual incidence of NCNP is increasing because of  
72 sedentary lifestyle and working conditions [5,6]. Patients' quality of life and  
73 efficiency of work decrease due to chronic pain, and high treatment expenses also  
74 cause a huge burden to society [7].

75 The mechanism of NCNP is still not clear. The researchers explained the  
76 mechanism from different aspects, such as the mechanical factors, EMG, and ROM.  
77 Altered muscle cross-sectional area, thickness, size, and activity of deep neck muscles  
78 have been mentioned repeatedly in the previous [8-10]. Rahnema et al. [11] showed  
79 the change of altered EMG activity and the atrophy of deep neck extensor in patients  
80 with NCNP which is thought to be the recurrence of NCNP. Barnsley et al. [12]  
81 demonstrated that limited ROM aggravates the tightness of the muscles surrounding  
82 the neck and joint adhesion which also leads to a decrease in biomechanical function  
83 of the neck, and this condition causes non-specific chronic neck pain. In addition,  
84 much attention has been paid to the scapular region. Dyskinesia of the scapula and  
85 misalignment of the scapula always follow with NCNP [13,14]. In addition, according  
86 to the "Bio-Psycho-Social" framework, repetitive and sedentary working conditions  
87 and postural abnormalities also contribute to NCNP [15]. Anxiety and depression  
88 associated with the existence of higher levels of pain in musculoskeletal pain  
89 conditions [16].

90 For most NCNP patients, first-line medication options always include analgesics  
91 like acetaminophen or non steroidal anti-inflammatory drugs (NSAIDs), but the  
92 effects of these drugs vary from person to person and they often do harm to the  
93 digestive, blood, urinary, and other systems because of the long-term use [17-19]. So,  
94 various complementary treatments have become more and more popular. Exercise  
95 therapy, ultrasound, acupuncture, electrical nerve stimulation, and manual therapy  
96 have also been used widely in treating NCNP [20]. However, poor standardization of  
97 experiments, small sample size, low-quality control, and insufficient objective index  
98 caused controversy about their efficacy.

99 Tuina therapy is also called Chinese massage [21]. Tuina has also been proved to  
100 be a feasible way to treat neck pain and has been widely used in China [22]. As an  
101 important part of Chinese traditional medicine, Tuina is a manual therapy with  
102 anatomical and physiological principles, putting emphasis on meridians and acupoints  
103 [23]. Tuina therapy mainly includes two parts: soft tissue manipulation and spinal  
104 manipulation. Soft tissue manipulation techniques include stroking, kneading, and  
105 drumming, which are also found in some Western massage techniques, and spinal

106 manipulation also combined with high-velocity low-amplitude thrust manipulation  
107 techniques [23]. Two systematic reviews had shown that Tuina therapy can reduce  
108 pain and muscle tension for patients with non-specific neck pain [24, 25]. Tuina  
109 therapy acts on soft tissue and connective tissue that may lead to local biochemical  
110 changes that regulate local blood circulation, improve muscle flexibility, enhance  
111 lymph movement, and loosen connective tissue adhesion, which may alternately  
112 improve local injury and inflammation of the reuptake mediator [26]. Chinese  
113 traditional exercise is also a kind of exercise therapy which puts attention on the  
114 coordination of posture, meditation, and breathing [27]. Exercise therapy has been  
115 proved to be good for non-specific chronic neck pain [28]. Yijinjing is an ancient  
116 Chinese traditional exercise which has been widely practiced for keeping fit and  
117 treating diseases. Yi means change, Jin refers to muscles and sinews, and Jing means  
118 methods, so Yijinjing means a series of exercises to change the muscle and sinews  
119 literally. Yijinjing is a low-intensity, noncompetitive, and non-impact exercise. TCM  
120 doctors often apply Yijinjing as a complementary therapy to NCNP. Yijinjing can  
121 reduce neck pain and disability, as well as reduce stress, anxiety, and depression by  
122 unique movements [29–31]. Based on previous researches, people can improve  
123 sub-health, reduce pain, and promote immune cell by practicing Yijinjing regularly  
124 [32, 33]. However, to confirm these findings, more studies with larger sample sizes,  
125 standardized trials, and adverse event reports are needed.

126 Studies have shown that a single treatment plan is not effective, so the  
127 combination therapy has received more attention and is recommended by related  
128 scholars [34, 35]. There is quite a little evidence for the efficacy of Tuina on  
129 non-specific chronic neck pain, especially when combined with Yijinjing. We  
130 hypothesize that Tuina and Yijinjing have beneficial effects on nonspecific chronic  
131 neck pain because that is a case with subacute and long-lasting neck pain [36]. We  
132 want to further explore whether Tuina combined with Yijinjing exercises can play a  
133 better role in pain, disability, and negative emotions. Thus, we designed a randomized  
134 controlled trial (RCT) to prove our hypothesis. This trial will provide a solid clinical  
135 foundation for the efficacy of Yijinjing combined with Tuina. It will be served as a  
136 prospective experiment as well.

## 137 **2.Study objectives**

138 This study is a randomized, evaluator and statisticianblinded, parallel-controlled,  
139 superiority trial. The purpose of this trial will be to assess the following: 1) Whether  
140 Tuina combined with Yijinjing is not inferior to Tuina regarding pain, disability, and  
141 negative emotions for patients with NCNP.

### 142 **Specific primary objective**

143 The specific primary objective is to determine the change in the visual analog  
144 scale (VAS) pain scores from baseline, 4 weeks during the intervention, at the end of  
145 the intervention(8 weeks), and 1 month after the intervention within and between the  
146 two groups.In particular, the change from baseline in VAS at week 8 was used as the  
147 primary outcome.

## 148 **3.Methods/design**

### 149 **3.1Study design**

150 This study is a single-center, randomized, and analyst-blinded controlled trial  
 151 with two arms: Tuina group (control) and Yijinjing combined with Tuina group  
 152 (intervention). The study protocol has been approved by the Regional Ethics Review  
 153 Committee of Yueyang Hospital of Integrated Traditional Chinese and Western  
 154 Medicine affiliated with Shanghai University of Traditional Chinese Medicine  
 155 (project number: 2020-018). A total of 102 eligible NCNP patients will be recruited  
 156 and assigned in a 1:1 ratio randomly. Written informed consent will be provided by all  
 157 patients. Independent researchers who are blinded to the patient assignment will  
 158 collect and analyze the outcome assessment and related data. The study design is  
 159 illustrated in the flow chart in Fig1.

160

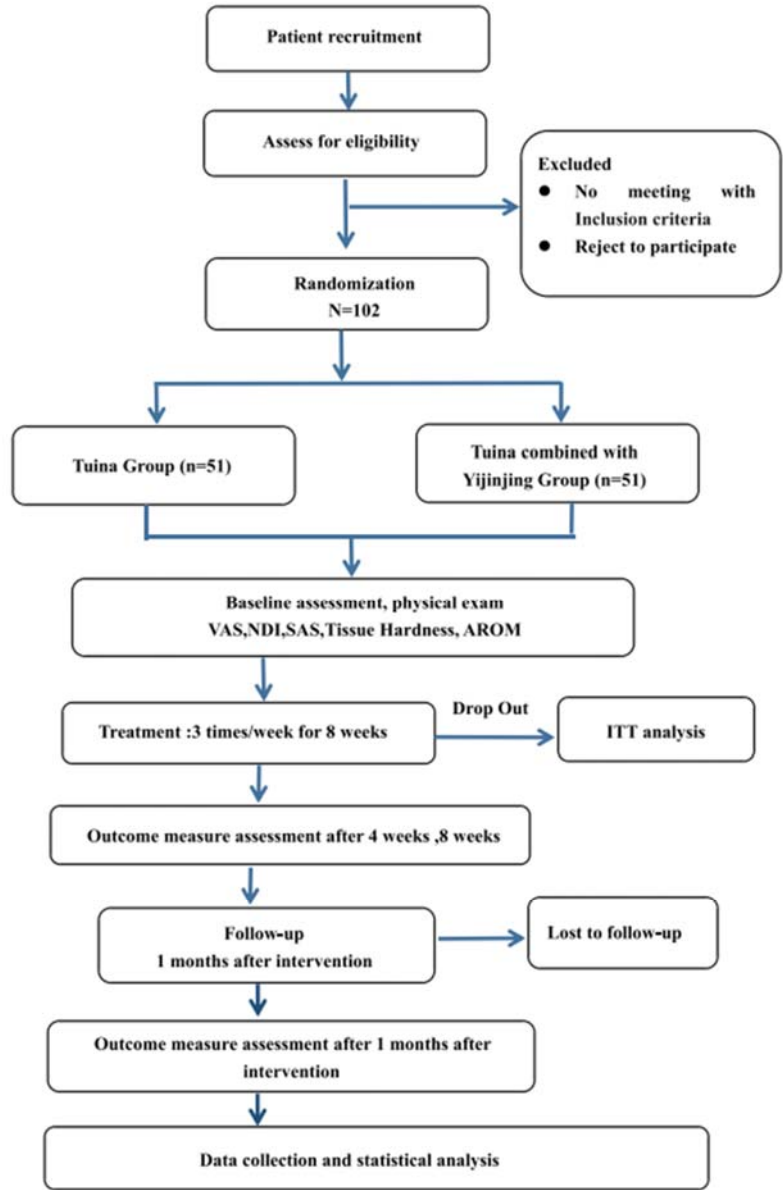

161

162

163

Fig1.Trial flowchart

164 **3.2 Participants and recruitment**

165 Eligible participants include patients diagnosed with NCNP according to the base  
166 guideline for the chiropractic treatment of adults with neck pain which is summarized  
167 by GDC of Canada [37]. Patients with non-specific neck pain for more than 3 months  
168 (no relief for more than 2 weeks) for the first time in the Tuina Department of  
169 Yueyang Hospital of Integrated Traditional Chinese and Western Medicine affiliated  
170 with Shanghai University of Traditional Chinese Medicine will be informed about this  
171 trial. If the patient expresses interest in this trial, a clinical trial communicator will  
172 make a contract with him/her immediately and make a brief introduction about the  
173 trial. If the patient decides to take part in this trial, he/she will have a face-to-face  
174 interview in a reception room of the Shanghai University of Traditional Chinese  
175 Medicine. Patients who meet the inclusion criteria will join the trial after they sign the  
176 informed consent form.

177 **Inclusion criteria**

178 Participants who meet all the following criteria can be enrolled:

179 1) Aged 20–50 ,2) Individuals from either sex ,3) Current neck pain (localized to  
180 the cervical or bilateral scapular region) ,4) Negative sign of neck distraction test,  
181 Spurling’s neck compression test, and Adson’s test ,5) Have neck pain symptoms of at  
182 least 3 months’ duration ,6) Visual analog scale (VAS)  $\geq 3$  and Neck Disability Index  
183 (NDI) score  $\geq 10$  at recruitment time ,7) No previous shoulder or neck surgery and no  
184 accompanying shoulder problems 8) Willingness to participate.

185 **Exclusion criteria**

186 Participants meeting any of the following criteria will be excluded from this trial:

187 1) Specific disorders of the cervical spine, such as disk prolapse, spinal stenosis,  
188 postoperative conditions, cervical radiculopathy, or myelopathy ,2) History of  
189 whiplash injury and/or head/neck injuries ,3) Are pregnant or have had a recent  
190 delivery ,4) Response to prior treatment (a patient with neck pain radiating into the  
191 arm whose arm pain resolved with an injection or medication),5) History of severe  
192 trauma, spasmodic torticollis, frequent migraine, fibromyalgia, shoulder diseases,  
193 inflammatory rheumatic diseases, tumor, osteoporosis, psychiatric illness, and  
194 obvious spinal deformity or neurological disease6) No clinical treatment for neck pain  
195 in the past 3 months ,7) Unable to speak or write Chinese in order to complete the  
196 questionnaires ,8) Alcohol and drug abuse.9) Have an uncomfortable reaction to  
197 Tuina ,10) Subjects with regular practice of Yijinjing, Qigong, or Yoga in the past 3  
198 months ,11) Poor cooperation.

199 **3.3 Randomization and allocation concealment**

200 The randomization list will be generated by a random number generator  
201 (Strategic Applications Software, version 9.1.3; SAS Institute Inc., Cary, NC, USA).  
202 The random numbers will be placed in an opaque envelope which has been numbered  
203 in order. Before implementing random assignment, the research team will record the  
204 detailed information of each participant in the clinical center, including the new  
205 participant (name, date of birth, participant and center code, and date of inclusion)  
206 during reporting and preparation of a signed informed consent. The therapist will  
207 sequentially open the envelopes and allocate the participants accordingly. Eligible

208 participants will be randomly assigned to the experimental group and the control  
209 group according to 1:1 equal proportion rules after the baseline assessment.

210 **3.4Blinding**

211 Patients will be informed of the type of treatment that they will receive. The  
212 therapists will know the allocation so they should learn how to communicate with  
213 patients to ensure treatment blinding. In order to reduce the risk of bias, evaluators,  
214 data managers, and statisticians will be unaware of the group assignments in the result  
215 evaluation procedures and data analysis. The blinding procedure will be operated until  
216 the data are locked.

217 **3.5Interventions**

218 The Tuina protocol used in this trial is the same as those used in our previous  
219 studies [38, 39]. It includes soft tissue manipulation and spinal manipulation, such as  
220 rolling, pressing, and tapping. Yijinjing for NCNP patients was designed on the basis  
221 of the textbook which has been used for teaching students in the universities of TCM  
222 [40, 41].

223 Participants in the Tuina group or the Yijinjing combined with Tuina group will  
224 receive Tuina treatment 3 times a week for 8 weeks. The treatment room will be  
225 controlled at 23–25°to ensure that the participants feel comfortable. The participants  
226 will be asked to rest for 15 min before Tuina treatment. They will be advised to lie in  
227 the prone position during the treatment. The intensity level of Tuina is based on  
228 physical examination and the therapist’s clinical experience, as well as after careful  
229 communication with each study participant. Tuina treatment will last for 25 min.

230 The participants who are in the Yijinjing combined with Tuina group will practice  
231 Yijinjing 3 times a week for 8 weeks. The patients will be assembled once a week for  
232 practicing Yijinjing together. The Yijinjing teacher will teach them how to practice  
233 Yijinjing. The teacher will also correct the wrong movement of patients. The patients  
234 will practice Yijinjing another two times per week at home. A digital video disk about  
235 the movements of Yijinjing in this trial will be provided to the participants. They can  
236 review the movements at home easily. The participants are asked to film themselves  
237 and sent it to the teacher by email or WeChat. The teacher will examine the  
238 participants’video carefully and give the patients some advice about practicing  
239 Yijinjing. Yijinjing treatment will last for 30 min.

240 **Tuina group**

241 In this arm of study, the Tuina therapist will administer a three-step protocol  
242 intended to alleviate neck pain and restore neck function by relaxing the soft tissue of  
243 the neck and shoulder. The specific protocol used is described below.

244 **Step 1: Soft tissue manipulation**

245 Patients are instructed by the therapist to lie in the prone position and to relax  
246 their mind and body naturally. Non-specific chronic neck pain conditions will be  
247 carefully examined by postural and palpatory assessment prior to treatment. The  
248 therapist will relax soft tissue and stiff muscles of the neck and shoulder by  
249 pressingkneading manipulation for 5 min. Then, the therapist will use his palms to roll  
250 the trapezius muscle gently so as to relax the back area for 5 min. The aim of this step  
251 is to resolve adhesion and increase general circulation.

252 Step 2: Clicking on the acupuncture point manipulation  
253 The therapist will press and knead GB20, DU16, GB21, SJ14, and SI14 for 2  
254 min each. This step is performed to unblock Qi stagnation and remove blood stasis by  
255 separating adherent fascicles. The amount of force used is determined by the patient's  
256 Deqi sensation, often described as a dull pain, heaviness, numbness, or soreness, and  
257 it is commonly regarded as an indicator of manipulation effectiveness in acupuncture  
258 and Tuina [42, 43].

259 Step 3: Spinal manipulation  
260 The spinal manipulation will be used after the above two steps have relieved the  
261 tensions of the muscles and soft tissues. The patient will be instructed to sit in an  
262 orthopnea position in order to ensure the safety of manipulation. First, the therapist  
263 can exert a gentle torque to align the patient's neck area and use the shake method to  
264 relax this area. Then, the therapist will press one thumb on the deviated spinous  
265 process while another palm holds the lower jaw. Using gentle tractions and twisting of  
266 the neck, the therapist should hold this position for a moment and then made an abrupt  
267 pulling motion to advance the stretch by 5 to 10°.

268 **Yijinjing combined with Tuina group**

269 In this arm of study, the steps of Tuina treatment are the same as the Tuina group.  
270 The Yijinjing teacher will administer a five-step protocol intended to improve the  
271 therapeutic effects and adjust physical and mental conditions. The main movements of  
272 Yijinjing are shown in Fig. 2

273 Step 1: The third aspect of Wei-tuo ,Step 2: Taking away a star and changing the  
274 Dipper for it,Step 3: Nine demons drawing their swords,Step 4: Bowing in  
275 salutation,Step 5: Wagging the tail.

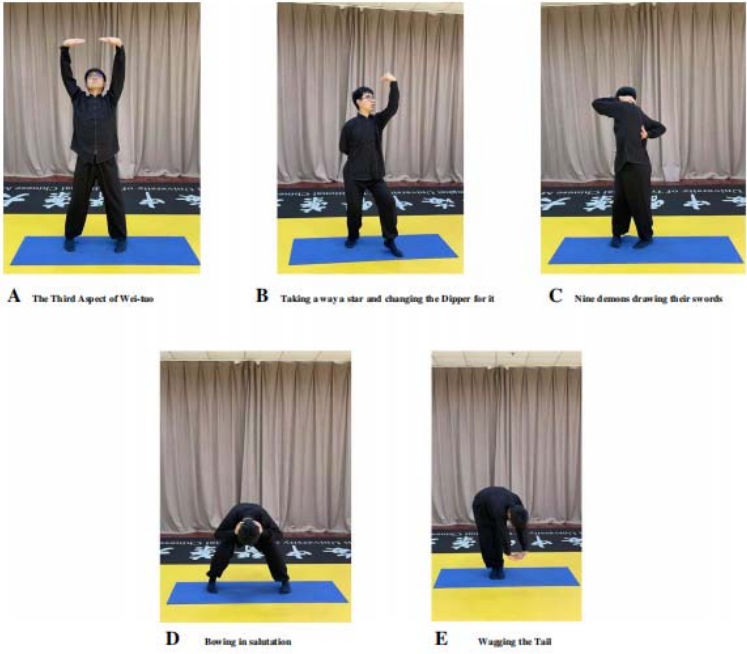

276

277 Fig2. The main movements of Yinjinging

278 **3.6Outcome measurements**



279 **Primary outcome measurement**

280 **VAS**

281 The intensity of NCNP will be measured by a scale of 10-cm horizontal line  
282 visual analog scale (VAS) [44]. The patients will be asked “How much pain do you  
283 have this moment?”, then the patient will mark on the 10-cm horizontal line visual  
284 analog scale. Zero means “absence of pain,” while 10 represent “the worst pain.” VAS  
285 has been proved as a valid and reliable outcome measure for recording pain with ICC  
286 = 0.96 to 0.98 according to a previous study [45].

287 **Secondary outcome measurements**

288 **NDI**

289 The Neck disability index(NDI) will be used to measure the patients' limitations  
290 in everyday-life activities because of neck function[46]. It is is most commonly used  
291 as a self-reported questionnaire in neck pain.It contains 10 questions , each of which  
292 comprise 6 potential answers ranging from 0 (no disability) to 5 (full disability) and  
293 the total of the NDI score varies between 0 and 50 points.The total NDI scores less  
294 than 4 indicate no disability; 5-14, mild disability; 15-24, moderate disability; 25-34,  
295 severe disability;more than 35 points “complete disability.”

296 **SAS**

297 The anxiety level of NCNP patient will be measured by Zung self-rating anxiety  
298 scale(SAS)[47]. 20 questions are divided into 4 groups:cognitive, autonomic, motor,  
299 and central nervous system symptoms. Each section is scored on four levels of anxiety  
300 intensity from “1” not at all” to “4”very much” and with a sum score between 20and  
301 80. A higher total score indicates a more severe anxiety level. The total raw scores  
302 range from 20 to 80. The raw score consequently needs to be converted to an  
303 “Anxiety Index”. The primary scores should be interpreted into Anxiety Index. The  
304 clinical interpretation of one's level of anxiety is as follows: 20-44 Normal Range;  
305 45-59 Mild to Moderate.60-74 marked to severe lever;75-80 extreme Anxiety Level.

306 **Tissue Hardness**

307 Tissue hardness is measured by a digital algometer (OE-220, ITO, Tokyo, Japan)  
308 The measurement has been use to test the tissue hardness at previous study[48,49,50].  
309 The measuring point is placed between C7 and acromion at the middle point of the  
310 upper trapezius muscle. The researcher put the meter on the measuring point  
311 perpendicularly and push the force slowly.When hearing the deep sound,the  
312 researcher should stop pushing and read the number. To standardize the speed of using  
313 this application, the researchers responsible for this measurement will practice one  
314 week before the study. They must explain the measurement by demonstrating at the  
315 the nar region of the hand. Three soft tissue measurements will be preformed at each  
316 point with an interval of 30 seconds between the two measurements,the mean of three  
317 measurements will be record.

318 **Active range of motion (AROM)**

319 Cervical active range of motion is measure by Spain ScanTM SH-105 (Ad-Or  
320 Medical Technologies Ltd, Israel). The validity and reproducibility of this  
321 measurement have been proved by many researchers[51,52]. SH-105 is composed of  
322 goniometer and a computer. The data will be transmitted by bluetooth. The patient

323 will be seated with a straight back leaning against the back of a chair. The goniometer  
 324 will be placed on the centre of the cranial. The researcher switch the mode and long  
 325 press the "start/end" button. When hearing the prompt sounds,the patient will be asked  
 326 to flex forward to the limit. The patient will be instructed to stop at the point where  
 327 pain symptoms preform. The research press the "Start/end" button again and the  
 328 computer will automatically record the data. Each movement(flexion-extension,  
 329 lateral flexion as well as rotation ) will be measured in this way three time.The mean  
 330 of each movement will be recorded.

331 **Safety evaluation**

332 The safety of patients will be monitored in every visit. Any adverse events (AES)  
 333 will be evaluated by the researchers. The AES in trail such as changes in pain,syncope,  
 334 vertigo,disability and etc. For any AES, no matter it is or not caused by intervention,  
 335 the treatment will be stopped immediately. The patient should take any medical aids  
 336 to alleviate symptoms. The adverse events should be report to the the relevant  
 337 responsible unit and the ethics committee in time.

338 **Follow-up**

339 To evaluate the long-term efficacy and safety of the intervention,we will follow  
 340 up the patients after treatments for 1 months. All the specific interventions and  
 341 outcome measures assessment process are shown in Fig3.

| Period Assessment Measure Point | Inclusion baseline<br>0 week after inclusion | First<br>4 weeks after inclusion            | Treatment<br>Second<br>8 weeks after inclusion | Follow-up<br>Third<br>12 weeks after inclusion |
|---------------------------------|----------------------------------------------|---------------------------------------------|------------------------------------------------|------------------------------------------------|
| Inclusion confirmed             | ✓                                            |                                             |                                                |                                                |
| Informed consent                | ✓                                            |                                             |                                                |                                                |
| Physical exam                   | ✓                                            | ✓                                           | ✓                                              | ✓                                              |
| Disease history                 | ✓                                            |                                             |                                                |                                                |
| Treatment history               | ✓                                            |                                             |                                                |                                                |
| Comorbidity                     | ✓                                            | ✓                                           | ✓                                              | ✓                                              |
| Current treatment               | ✓                                            | ✓                                           | ✓                                              | ✓                                              |
| Visual analogue scale (VAS)     | ✓                                            | Pain condition and neck function assessment |                                                | ✓                                              |
| Neck Disability Index (NDI)     | ✓                                            | ✓                                           | ✓                                              | ✓                                              |
| Self-Rating Anxiety Scale(SAS)  | ✓                                            | ✓                                           | ✓                                              | ✓                                              |
| Time hardness                   | ✓                                            | ✓                                           | ✓                                              | ✓                                              |
| Active Range Of Motion(AROM)    | ✓                                            | ✓                                           | ✓                                              | ✓                                              |
| Adverse event                   |                                              | Data collection and statistical analysis    |                                                | ✓                                              |
| Causes of dropout               |                                              | ✓                                           | ✓                                              | ✓                                              |
| Safety analysis                 |                                              | ✓                                           | ✓                                              | ✓                                              |
| Compliance analysis             |                                              | ✓                                           | ✓                                              | ✓                                              |

342

343 Fig3. All interventions,measurements and measuring time points

344 **3.7Sample size calculation**

345 The following two hypotheses are related to the differences between the two  
 346 groups.

347  $H_0: \mu_1 - \mu_2 \leq \Delta$

348  $H_1: \mu_1 - \mu_2 > \Delta$

349 where  $\mu_1$  is the VAS score for treating 8 weeks in Tuina group, and  $\mu_2$  is the VAS  
 350 score for treating 8 weeks in the Tuina combined with Yijinjing group.According to a  
 351 previous clinical study in China[53], the mean and standard deviation of VAS in Tuina  
 352 group(n=34) after intervention was 5.5 and 1.1.The the mean and standard deviation  
 353 of VAS in Tuina combined with neck exercise group(n=34) after intervention was  
 354 4.7 and 1.3.The following formula as used to calculate the sample size in this trial:

$$n = \frac{2(z_{\alpha/2} + z_{\beta})^2 \times \sigma^2}{(\mu_2 - \mu_1 - \Delta)^2}$$

355

356

$$n = \frac{2(0.025 + 0.2)^2 \times 1.3^2}{(4.7 - 5.5 - 0)^2} = 42$$

357

358 ( $\alpha=0.025$   $\beta=0.2$ , superiority design,  $\Delta=0$  )Considering a dropout rate of 20%, each  
359 group will require 51 cases. Therefore, a total of 102 participants should be recruited  
360 for this randomized controlled trial (RCT).

### 361 **3.8Statistical analysis**

362 All statistical analyses will be performed with SPSS Software (SPSS, version  
363 24.0, SPSS Inc., Chicago, IL, USA) by statisticians who are independent of the  
364 research team and blinded to the group allocation. Data analysis will be based on the  
365 intention-to-treat (ITT) principles. The statistical significance was accepted for values  
366 of  $p < 0.05$ . Participants who fail to complete the study will be treated as having no  
367 change from baseline at all times. Descriptive statistics will be used to compare  
368 demographic and baseline information and evaluate the credibility of the groups. The  
369 normality of data will be tested by Kolmogorov–Smirnov test. Parametric statistics  
370 (Tukey test) or non-parametric statistics (Wilcoxon rank sum test) will be used for the  
371 within- and between-group according to the results of homogeneity and normality  
372 analysis. If the data does not conform to a normal distribution, a covariance analysis  
373 will be used. The efficacy will be measured at four time points. A repeated measures  
374 analysis of variance will be conducted to analyze dependent variables (from baseline  
375 and follow-up ). Bonferroni and Dunn tests will be used for multiple comparisons.  
376 The intra-group comparison (comparison between baseline and follow-up) will be  
377 tested by two-sided paired t test. The difference of categorical  
378 variables (VAS, NDI, SAS, PPT, AROM) and adverse effects between groups will be  
379 analyzed by using Chi-square test or Fisher's exact test. All numerical data will be  
380 presented as the mean  $\pm$  SD and categorical variables will be described with  
381 percentages (%). If it is necessary, post hoc analyses will be performed. The  
382 confidence interval will be established at 95% and the significance level at 0.05.

### 383 **3.9Ethical considerations**

384 The study collects data from patients with NCNP. The informed consent are  
385 required from the patients. Patients can terminate participation at any time. The results  
386 of the trial will be shown in tables and figures only and no individual will be  
387 identified. All data collected from this study can only be used for this research. All  
388 members of the research team have ethical principles of confidentiality. In addition,  
389 we will try our best to deal with ethical issues which arise during the study. We  
390 estimate that the benefits of the study far outweigh any possible risks. The trial has  
391 been approved by the ethics committee of Yueyang Hospital of Integrated Traditional  
392 Chinese and Western Medicine, which is affiliated with Shanghai University of  
393 Traditional Chinese Medicine (2020-018) and registered on ChiCTR (2000036805).

### 394 **4. Discussion**

395 Nonspecific chronic neck pain(NCNP) is a common and high prevalence  
396 musculoskeletal problem in the world. It can cause ADL ,work disability and  
397 economic cost and psychological stress[54,55]. Because of high recurrence rate, a  
398 scientific and reasonable intervention should be explored and promoted. It can not  
399 only relieve symptoms and reduce the burden of individual and society, but also  
400 decrease complication and improve the quality of life. Yijinjing and Tuina are  
401 important components of traditional Chinese medicine. They have been used  
402 thousands of years to keep people healthy. Quite a few people know  
403 the concrete operating procedure,advantages ,efficacy of such interventions. Therefore,  
404 the aim of this study is to investigate whether Yijinjing combined with Tuina has any  
405 superiority to than Tuina.

406 According to TCM, a healthy human body depends on the coordination of the  
407 internal organs and the harmony of qi and blood. The main reason of pain will be  
408 attribute to qi stagnation and blood stasis. In this study , relaxing  
409 manipulation,clicking on the acupuncture point manipulation and neck structural  
410 rectification are chosen to release adhesion and smooth joint movement so as to  
411 alleviate pain improve joint movement condition. By using these manipulations, the  
412 circulation of qi and blood will be promoted. Five movements of Yijinjing which are  
413 specifically for neck are chosen. These movements include neck flexion, rotation and  
414 lateral flexion. The features of Yijinjing is the harmony of body, breath and mind. It  
415 puts emphasis on the unity of strength and meditation by using static postures and  
416 dynamic movements. It can circulate qi and blood, strengthen muscles and nourish  
417 tissues and organs and also arrest spasm[56].Previous study demonstrated that regular  
418 and long-term training of Yijinjing can raise the skeletal muscle strength and improve  
419 the motor function and ADL[57-58]. A clinical research reported that after 6 month  
420 Yijinjing multiple factors of depression and anxiety dropped significantly. It indicated  
421 that Yijinjing can improve patients' mental conditions[59] .

422 The present trail is a comparative efficacy of Tuina(control) and Yijinjing combined  
423 with Tuina (intervention) for the physical and mental symptoms of NCNP patient. We  
424 want to explore whether Yijinjing combined with Tuina is better than Tuina. We will  
425 evaluate three aspect of neck pain:pain,physical function and mental function. we will  
426 use validated scales and questionnaires and some measuring instrument to assess the  
427 clinical outcomes.

428 Pain is the most important symptom of neck pain, so visual analog scale( visual  
429 analog scale ) will be used as the primary outcome.It. It can evaluate the intensity of  
430 neck pain. The secondary outcomes are NDI,which can evaluate the limitation of  
431 daily life because of NCNP. Cervical active range of motion (AROM) which can  
432 evaluate the neck active range of motion is measure by using a easy  
433 equipment.SAS ,which can evaluate the anxiety level of patients.Tissue Hardness will  
434 be measured by a tissue hardness meter and expressed in numbers.

435 To the best of our knowledge, no study has proved the efficacy of Yijinjing combined  
436 with Tuina for patients with NCNP.

437 High quality clinical data will be collected because of the rigorous experimental  
438 design. The efficacy of this specific intervention protocol for treating NCNP will be

439 evaluated by these data. We hope that this study will provide a solid foundation for  
440 the treatment of NCNP, as well as Tuina and Yijinjing research.

#### 441 **References**

442 1. Gummesson C, Isacsson SO, Isacsson AH, et al. The transition of reported pain  
443 in different body regions--a one-year follow-up study. *BMC Musculoskeletal*  
444 *Disorders*, 2006;7:17.

445 2. López-de-Uralde-Villanueva I, Beltran-Alacreu H, Fernández-Carnero J, La  
446 Touche R. Pain management using a multimodal physiotherapy program including a  
447 biobehavioral approach for chronic nonspecific neck pain: a randomized controlled  
448 trial. *Physiother Theory Pract*. 2020;36(1):45-62.

449 3. Chiu TT, Leung AS. Neck pain in Hong Kong: a telephone survey on  
450 prevalence, consequences, and risk groups. *Spine (Phila Pa 1976)*.  
451 2006;31(16):E540-E544.

452 4. Lau HMC, Wing TT, Lam TH. The effectiveness of thoracic manipulation on  
453 patients with chronic mechanical neck pain – A randomized controlled trial. *Man*  
454 *Ther*. 2011;16(2):141-147.

455 5. Feng B, Liang Q, Wang Y, Andersen LL, Szeto G. Prevalence of work-related  
456 musculoskeletal symptoms of the neck and upper extremity among dentists in China.  
457 *BMJ Open*. 2014;4(12):e006451.

458 6. Hogg-Johnson S, van der Velde G, Carroll LJ, et al. The burden and  
459 determinants of neck pain in the general population: results of the bone and joint  
460 decade 2000–2010 task force on neck pain and its associated disorders. *J*  
461 *Manipulative Physiol Ther*. 2009;32(2):S46–S60.

462 7. Haldeman S, Carroll L, Cassidy JD. Findings from the bone and joint decade  
463 2000 to 2010 task force on neck pain and its associated disorders. *J Occup Environ*  
464 *Med*. 2010;52(4):424–427.

465 8. Wermeling M, Scherer M, Himmel W. GPs' experiences of managing  
466 non-specific neck pain--a qualitative study. *Fam Pract*. 2011;28(3):300–306.

467 9. Falla DL, Jull GA, Hodges PW. Patients with neck pain demonstrate reduced  
468 electromyographic activity of the deep cervical flexor muscles during performance of  
469 the craniocervical flexion test. *Spine*. 2004;29(19):2108–2114.

470 10. Kim JY, Kwag KI. Clinical effects of deep cervical flexor muscle activation in  
471 patients with chronic neck pain. *J Phys Ther Sci*. 2016;28(1):269–273.

472 11. Karimi N, Rezasoltani A, Rahnama L, Noori-Kochi F, Jaberzadeh S.  
473 Ultrasonographic analysis of dorsal neck muscles thickness changes induced by  
474 isometric contraction of shoulder muscles: a comparison between patients with  
475 chronic neck pain and healthy controls. *Man Ther*. 2016;22: 174–178.

476 12. Barnsley L, Lord S, Bogduk N: Comparative local anaesthetic blocks in the  
477 diagnosis of cervical zygapophysial joint pain. *Pain*, 1993;55:99–106

478 13. Helgadottir H, Kristjansson E, Mottram S, Karduna A, Jonsson H Jr. Altered  
479 scapular orientation during arm elevation in patients with insidious onset neck pain  
480 and whiplash-associated disorder. *J Orthop Sports Phys Ther*. 2010;40(12):784–791.

- 481 14.Cagnie B, Struyf F, Cools A, Castelein B, Danneels L, O’Leary S. The  
482 relevance of scapular dysfunction in neck pain: a brief commentary. *J Orthop Sports*  
483 *Phys Ther.* 2014;44(6):435–439.
- 484 15.Côté P, van der Velde G, Cassidy JD, et al. The burden and determinants of  
485 neck pain in workers: results of the Bone and Joint Decade 2000-2010 Task Force on  
486 Neck Pain and Its Associated Disorders. *Spine (Phila Pa 1976).* 2008;33(4  
487 Suppl):S60-S74
- 488 16.Porta M. A comparative trial of botulinum toxin type A and  
489 methylprednisolone for The treatment of myofascial pain syndrome and pain from  
490 chronic muscle spasm. *Pain.* 2000;85(1-2):101-105.
- 491 17.Gilron I , Jensen TS , Dickenson AH. Combination pharmacotherapy for  
492 management of chronic pain: from bench to bedside. *Lancet Neurology.*  
493 2013;12(11):1084-1095.
- 494 18.Graham DY. Prevention of gastroduodenal injury induced by chronic  
495 nonsteroidal antiinflammatory drug therapy.*Gastroenterology.*1989;96(2Pt2  
496 Suppl):675-681.
- 497 19.Harirforoosh S, Asghar W, Jamali F. Adverse effects of nonsteroidal  
498 antiinflammatory drugs: an update of gastrointestinal, cardiovascular and renal  
499 complications. *J Pharm Pharm Sci.* 2013;16(5):821-847.
- 500 20.Parikh P, Santaguida P,Macdermid J,et al. Comparison of CPG's for  
501 thediagnosis,prognosis and management of non-specific neck pain: a systematic  
502 review. *BMC Musculoskelet Disord.* 2019;20(1):81.
- 503 21.Cheng YH, Huang GC. Efficacy of massage therapy on pain and  
504 dysfunction in patients with neck pain: A systematic review and meta-analysis.*Evid*  
505 *Based Complement Alternat Med.*2014;204360.
- 506 22.Pach D , Piper M , Lotz F , et al. Effectiveness and Cost-Effectiveness of  
507 Tuina for Chronic Neck Pain: A Randomized Controlled Trial Comparing Tuina with  
508 a No-Intervention Waiting List. *J Altern Complement Med.* 2018;24(3):231-237.
- 509 23.Yuan QL, Guo TM, Liu L, et al. Traditional Chinese medicine for neck pain  
510 and low back pain: A systematic review and meta-analysis. *PLoS One*  
511 2015;10(2):e0117146
- 512 24.Patel KC, Gross A, Graham N, Goldsmith CH, Ezzo J, Morien A, et al.  
513 Massage for mechanical neck disorders. *Cochrane Database Syst Rev.*  
514 2012;9:CD004871.
- 515 25.Kong LJ, Zhan HS, Cheng YW, Yuan WA, Chen B, Fang M. Massage therapy  
516 for neck and shoulder pain: a systematic review and meta-analysis. *Evid Based*  
517 *Complement Alternat Med.* 2013;10(2013):613279.
- 518 26.G. C. Goats, “Massage—the scientific basis of an ancient art: part  
519 2—physiological and therapeutic effects,” *British Journal of Sports Medicine*, vol. 28,  
520 no. 3, pp. 153–156, 1994.
- 521 27.Wang X , Pi Y , Chen B , et al. Effect of traditional Chinese exercise on the  
522 quality of life and depression for chronic diseases: a meta-analysis of randomised  
523 trials.*Sci Rep.* 2015;5:15913.

- 524 28. Bertozzi L, Gardenghi I, Turoni F, et al. Effect of therapeutic exercise on pain  
525 and disability in the management of chronic nonspecific neck pain: systematic review  
526 and meta-analysis of randomized trials. *Phys Ther* 2013; 93(8): 1026–1036.
- 527 29. Xiang HP, Liu SJ, Jia HR, et al. A brief analysis on the effect of fitness qigong  
528 Yijin method on respiratory muscle[in Chinese]. *J Hubei Sports Sci.*2006;25:42–46.
- 529 30. Zhao LJ, Liu CX, Zhao LB, et al. Effects of Yijinjing exercising combined  
530 with Gutong plaster on physiology curvature of cervical spondylosis with cervical  
531 type[in Chinese]. *Hebei J Trad Chin Med* 2017;39:830–834.
- 532 31. Liu YJ. The study yijinjing and taijiquan influence of depression on  
533 University students [in Chinese]. *Sichuan Sport Sci* 2013;6:49–51.
- 534 32. Hou ZP. Mechanism of yi jinjing for the treatment of sub-health state [in  
535 Chinese]. *J Liaoning Univ TCM* 2009;11:69–70.
- 536 33. Yan XH. Effect of yi jinjing on the respiratory health rehabilitation [in  
537 Chinese]. *J Nangchang Colleg Educ* 2010; 25:166.
- 538 34. Childs JD, Cleland JA, Elliott JM, et al. Neck pain: Clinical practice  
539 guidelines linked to the International Classification of Functioning, Disability, and  
540 Health from the Orthopedic Section of the American Physical Therapy Association. *J*  
541 *Orthop Sports Phys Ther.* 2008;38(9):A1-A34.
- 542 35. Goode AP, Freburger J, Carey T. Prevalence, practice patterns, and evidence  
543 for chronic neck pain. *Arthritis Care Res (Hoboken)*, 2010, 62(11):1594-1601
- 544 36. Skillgate E, Bill AS, Côté P, Viklund P, Peterson A, Holm LW. The effect of  
545 massage therapy and/or exercise therapy on subacute or long-lasting neck pain--the  
546 Stockholm neck trial (STONE): study protocol for a randomized controlled trial.  
547 *Trials.* 2015; 16:414
- 548 37. Bryans R , Decina P , Descarreaux M , et al. Evidence-Based Guidelines for  
549 the Chiropractic Treatment of Adults With Neck Pain. *J Manipulative Physiol Ther.*  
550 2014;37(1):42-63.
- 551 38. Wu Z , Kong L , Zhu Q , et al. Efficacy of tuina in patients with chronic neck  
552 pain: study protocol for a randomized controlled trial. *Trials.*2019;20(1):59.
- 553 39. Song BL, Fang M. *Tuina Therapeutics.* Beijing: Chinese Traditional Medicine  
554 Publishing House;2016.
- 555 40. Yao F. *One finger Chan Tuina.* Beijing: Chinese Traditional Medicine  
556 Publishing House;2018.
- 557 41. Lv LJ. *Traditional Chinese Exercise of Tuina.* Beijing: Chinese Traditional  
558 Medicine Publishing House;2016
- 559 42. Hui KK, Nixon EE, Vangel MG, Liu J, Marina O, Napadow V, Hodge SM,  
560 Rosen BR, Makris N, Kennedy DN: Characterization of the “deqi” response in  
561 acupuncture. *BMC Complement Altern Med* 2007; 7:33.
- 562 43. Shi GX, Yang XM, Liu CZ, Wang LP. Factors contributing to therapeutic  
563 effects evaluated in acupuncture clinical trials. *Trials.* 2012; 13:42.
- 564 44. Tuttle N. Do changes within a manual therapy treatment session predict  
565 between-session changes for patients with cervical spine pain? *Aust J Physiother.*  
566 2005;51(1):43–48.

567 45. Bijur PE, Silver W, Gallagher EJ. Reliability of the visual analog scale for  
568 measurement of acute pain. *Acad Emerg Med.* 2001;8(12):1153-1157.

569 46. Vernon H, Mior S. The neck disability index: a study of reliability and validity.  
570 *J Manipulative Physiol Ther.* 1991;14(7):409-415.

571 47. W.W.K. Zung, Zung self-rating depression scale and depression status  
572 inventory, in: *Assessment of Depression*, Springer Berlin Heidelberg, Berlin,  
573 Heidelberg, 1986, pp. 221-231.

574 48. Zheng Z, Wang J, Gao Q, et al. Therapeutic evaluation of lumbar tender  
575 point deep massage for chronic non-specific low back pain. *J Tradit Chin Med,*  
576 2012,32(4):534-537.

577 49. Peerada, Damapong, Naowarat, et al. A Randomized Controlled Trial on the  
578 Effectiveness of Court-Type Traditional Thai Massage versus Amitriptyline in  
579 Patients with Chronic Tension-Type Headache. *Evid Based Complement Alternat*  
580 *Med.* 2015;2015:930175.

581 50. Lluch E, Schomacher J, Gizzi L, Petzke F, Seegar D, Falla D. Immediate  
582 effects of active cranio-cervical flexion exercise versus passive mobilization of the  
583 upper cervical spine on pain and performance on the cranio-cervical flexion test.  
584 *Man Ther* 2014;19(1):25-31.

585 51. Martel J, Dugas C, Dubois JD, et al. A randomised controlled trial of  
586 preventive spinal manipulation with and without a home exercise program for patients  
587 with chronic neck pain. *BMC Musculoskelet Disord.* 2011;12: 41.

588 52. Edwards J, Knowles N. Superficial dry needling and active stretching in the  
589 treatment of myofascial pain--a randomised controlled trial. *Acupunct*  
590 *Med.* 2003;21(3):80-86.

591 53. Liang BJ, Zhang LC. Effect of cervical spine exercises combined with  
592 massage on the treatment of NCNP[in Chinese]. *China Rural Medicine.*  
593 2016;23(2):41-42.

594 54. Madson TJ, Cieslak KR, Gay RE. Joint mobilization vs massage for chronic  
595 mechanical neck pain: A pilot study to assess recruitment strategies and estimate  
596 outcome measure variability. *J Manipulative Physiol Ther.* 2010;33(9):644-651.

597 55. Schwerla F, Bischoff A, Nurnberger A, Genter P, Guillaume JP, Resch KL.  
598 Osteopathic treatment of patients with chronic non-specific neck pain: A randomised  
599 controlled trial of efficacy. *Forsch Komplementmed.* 2008;15(3):138-145.

600 56. Zhang Q, Wang YG, Liu K. Research progresses on application of Yi Jin Jing  
601 (Sinew-transforming Qigong Exercises)[in Chinese]. *Henan Zhongyi*, 2013, 33(5):  
602 774-776.

603 57. Guo CQ, Cheng YW, Kong LJ, Bu JH, Yang XC. On Gongfa Gongli of Yi Jin  
604 Jing from the perspective of biomechanics[in Chinese]. *Changchun Zhongyiyao*  
605 *Daxue Xuebao*, 2014, 30(2): 262-264.

606 58. Hu WM, Gong L. The preliminary experience of spreading tuina Yijinjing  
607 Gong in the community[in Chinese]. *Anmo Yu Kangfu Yixue*, 2012, 2(10): 2-3.

608 59. Zhang WC, Zhong ZB, Wu QH, Chen XF, Wang SY, Zhang Y. A research on  
609 health Qigong-Yi Jin Jing for slowing down intelligence decline of the aged[in  
610 Chinese]. *Zhongguo Xingwei Yixue Kexue*, 2006, 15(9): 827.



611  
612  
613  
614  
615  
616  
617  
618  
619  
620  
621  
622  
623  
624  
625  
626  
627  
628  
629  
630  
631  
632  
633  
634  
635  
636  
637  
638  
639  
640  
641
