# Supplementary material for: Effectiveness of Tuina Therapy Combined With Yijinjing Exercise in the Treatment of Nonspecific Chronic Neck Pain: A Randomized Clinical Trial
Source: PubMed Central journal article supplement (PMC9856335; doi:10.1001/jamanetworkopen.2022.46538), 2022-12-13
Supplement: jamanetwopen-e2246538-s003.pdf [file jamanetwopen-e2246538-s003.pdf]

## Data Sharing Statement

Cheng. Effectiveness of Tuina Therapy Combined With Yijinjing Exercise in the Treatment of Nonspecific Chronic Neck Pain. *JAMA Netw Open*. Published December 13, 2022.  
doi:10.1001/jamanetworkopen.2022.46538

### Data

**Data available:** Yes

**Data types:** Deidentified participant data

**How to access data:** Send request email to Professor Yao, [doctoryaofei@126.com](mailto:doctoryaofei@126.com).

**When available:** With publication

### Supporting Documents

**Document types:** None

### Additional Information

**Who can access the data:** Researchers whose proposed use of the data has been approved

**Types of analyses:** For a specified purpose

**Mechanisms of data availability:** After approval of a proposal, and with a signed data access agreement
